# Supplementary material for: Metformin loaded porous particles with bio-microenvironment responsiveness for promoting tumor immunotherapy
Source: Royal Society of Chemistry journal article supplement (doi:10.1039/d0bm01931c), 2020-12-30
Supplement: d0bm01931c1.pdf [file d0bm01931c1.pdf]

## Supplementary Materials

# Metformin encapsulated porous particles with bio-microenvironment responsiveness for promoting tumor immunotherapy

Yuanyuan Wen<sup>a,b,c</sup>, Yuxiao Liu<sup>d</sup>, Canwen Chen<sup>e</sup>, Junjie Chi<sup>a,d</sup>, Liping Zhong<sup>b\*</sup>, Yongxiang Zhao<sup>b\*</sup>, Yuanjin Zhao<sup>a,d,e\*</sup>

a Translational Medicine Laboratory, The First Affiliated Hospital of Wenzhou Medical University, Wenzhou 325035, China

b National Center for International Biotargeting Theranostics, Guangxi Key Laboratory of Biotargeting Theranostics, Collaborative Innovation Center for Targeting Tumor Theranostics, Guangxi Medical University, Guangxi, 530021, China

c Department of Pharmacy, School of basic medicine and clinical pharmacy, China Pharmaceutical University, Nanjing 211198, China

d State Key Laboratory of Bioelectronics, School of Biological Science and Medical Engineering, Southeast University, Nanjing, 210096, China

e Department of Rheumatology and Immunology, Institute of Translational Medicine, The Affiliated Drum Tower Hospital of Nanjing University Medical School, 210008 Nanjing, China

E-mail: [zhong\\_liping@163.com](mailto:zhong_liping@163.com) (L.P.Z); [yongxiang\\_zhao@126.com](mailto:yongxiang_zhao@126.com) (Y.X.Z);

[yjzhao@seu.edu.cn](mailto:yjzhao@seu.edu.cn) (Y.J.Z.)

### Supporting Figures:

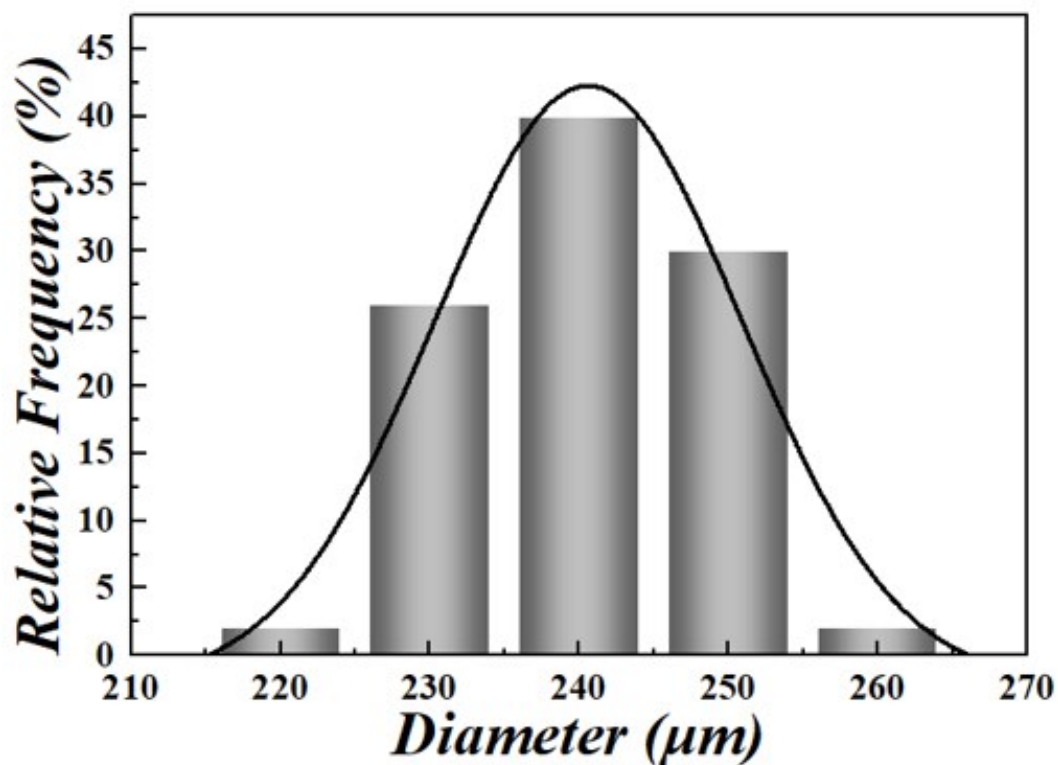

**Fig. S1** The statistical diameter distribution of silica colloidal crystal beads (SCCBs). The diameters of particles ranged from 220  $\mu\text{m}$  to 260  $\mu\text{m}$  and the average diameter was calculated to be 235.2  $\mu\text{m}$ .

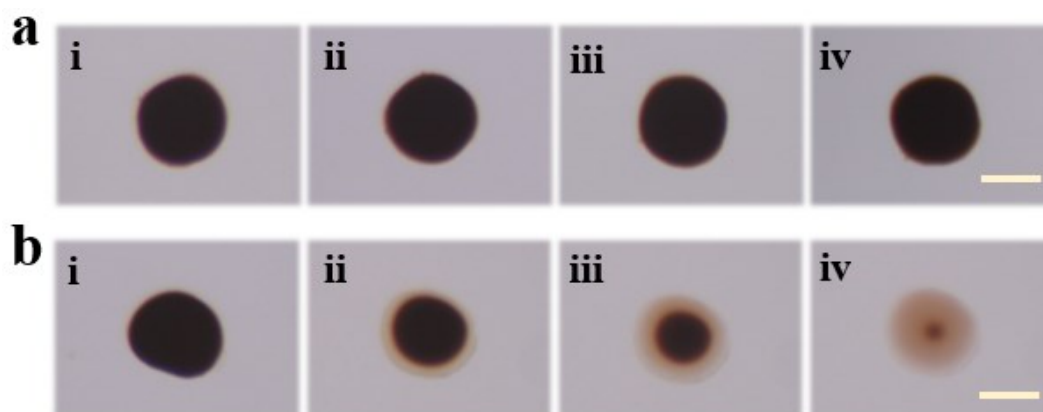

**Fig. S2** (a) The CS@MnO<sub>2</sub> particles in PBS for 0 day ( i ), 1 day ( ii ), 2 days ( iii ), 3 days ( iv ). (b) The CS@MnO<sub>2</sub> particles in TME solution for 0 min ( i ), 5 min ( ii ), 10 min ( iii ), 15 min ( iv ). The scale bars are 200  $\mu\text{m}$ .

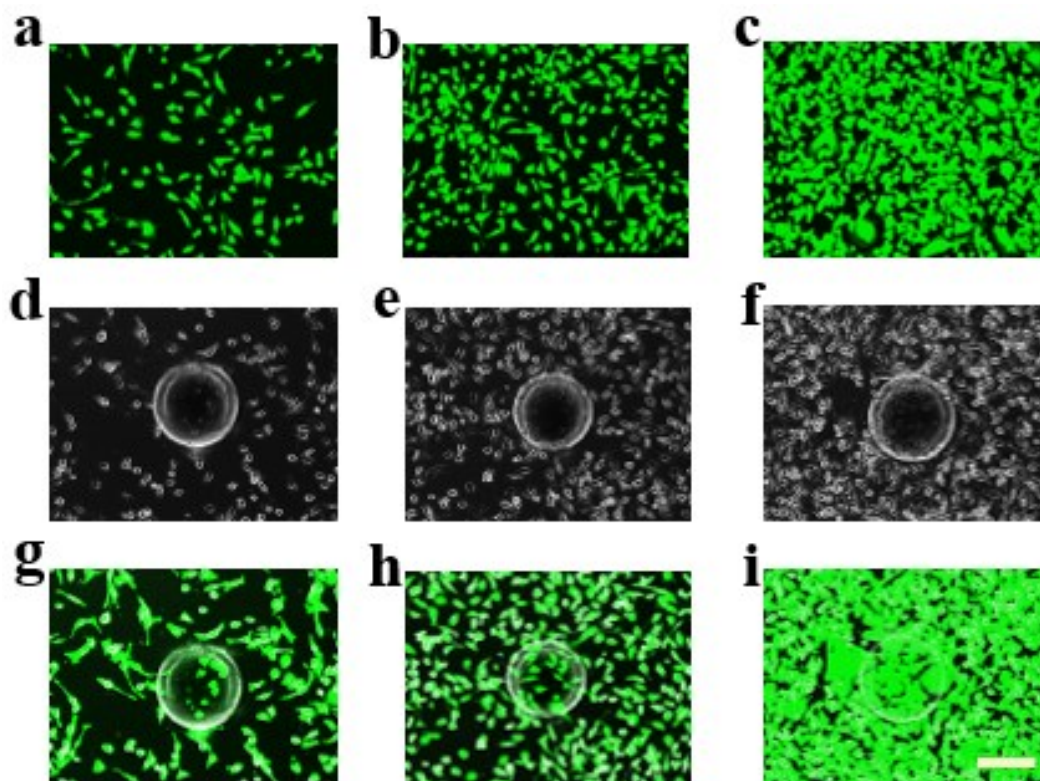

**Fig. S3** Images of MDA-MB-231 cells recorded by laser confocal microscopy. (a) The fluorescent images of MDA-MB-231 cells cultured for 1 day ( i ), 2 days ( ii ) and 3 days ( iii). (b) The optical images of MDA-MB-231 cells cultured with CS@MnO<sub>2</sub> particles for 1 day ( i ), 2 days ( ii ) and 3 days ( iii). (c) The fluorescent images of MDA-MB-231 cells cultured with CS@MnO<sub>2</sub> particles for 1 day ( i ), 2 days ( ii ) and 3 days ( iii). The scale bar is 200  $\mu$ m.

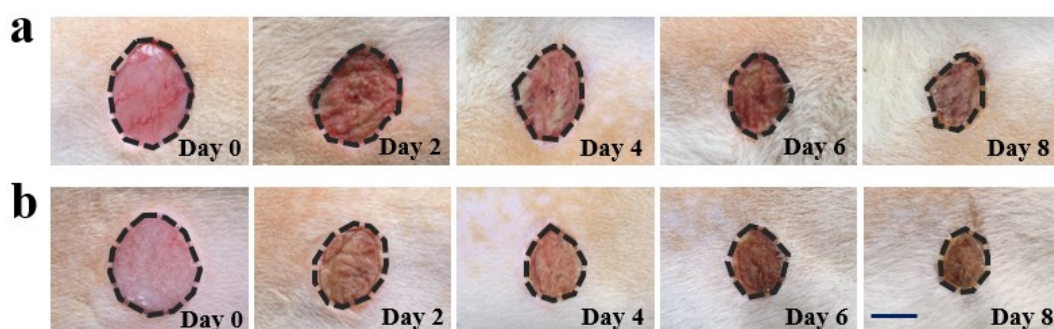

**Fig. S4** Images of wounds in control group treated with PBS (a) and in experimental group treated with CS particles (b). The scale bar is 5mm.

**Author contributions**

Y.J.Z. conceived the idea and designed the experiment; Y.Y.W. and C.W.C. conducted experiments and data analysis; Y.Y.W. and Y.X.L. wrote the manuscript; J.J.C., L.P.Z. and Y.X.Z. contributed to scientific discussion of the article.
